# Supplementary material for: Autumnal leaf senescence in Miscanthus × giganteus and leaf [N] differ by stand age
Source: PubMed Central journal article supplement (PMC4493784; doi:10.1093/jxb/erv129), 2015-04-04
Supplement: supp_erv129_jexbot138578_file001.pdf [file supp_erv129_jexbot138578_file001.pdf]

**Title: Autumnal leaf senescence in *Miscanthus × giganteus* and leaf [N] differ by stand age**

**Authors: Nicholas N Boersma, Frank G Dohleman, Fernando Miguez, and Emily Heaton**

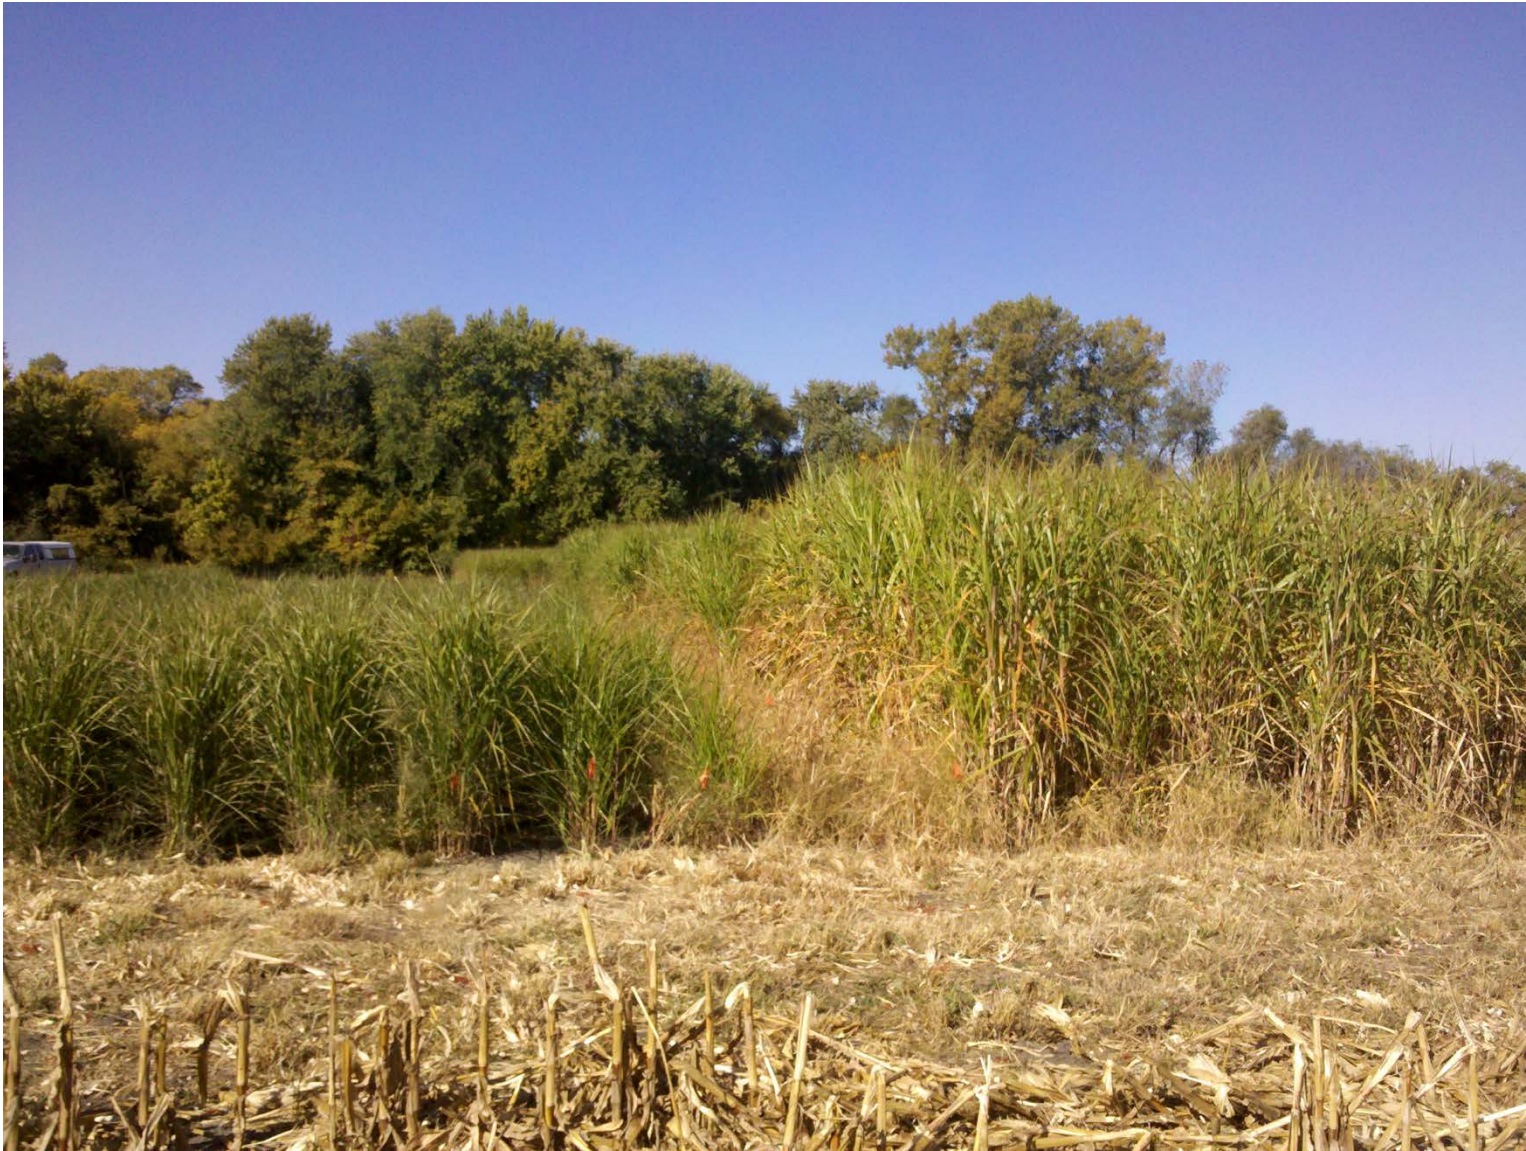

**Supplementary Fig. S1.** First (left) and second-year (right) *M. x giganteus* stands. First-year *M. x giganteus* remains green long into the autumn, whereas second-year *M. x giganteus* begins yellowing and senescing which is especially evident near the bottom of the plants. Note corn (*Zea mays* L.) has been harvested prior to this photo. Photo credit: Nicholas Boersma, 4 October 2011.
